# Supplementary material for: The Therapy of Vulvar Carcinoma—Evaluation of Surgical Options in a Retrospective Monocentric Study
Source: MDPI journal article supplement (doi:10.3390/life13101973), 2023-09-27
Supplement: s1 [file s1]

**SUPPLEMENTARY MATERIAL - The Therapy of Vulvar Carcinoma - Evaluation of Surgical Options in a Retrospective Monocentric Study**

**Table S1.** Number of patients (absolute numbers and percentages) treated by total vulvectomy and hemivulvectomy in the years 2006-2011.

|                | 2006 n=13    | 2007 n=7     | 2008 n=11   | 2009 n=12    | 2010 n=16     | 2011 n=17     | Total n=76    |
|----------------|--------------|--------------|-------------|--------------|---------------|---------------|---------------|
| vulvectomy     | 4<br>(30,7%) | 5<br>(71,4%) | 1<br>(9%)   | 5<br>(41,6%) | 5<br>(31,3%)  | 3 1<br>(7,6%) | 23<br>(30,2%) |
| hemivulvectomy | 9<br>(69,3%) | 2<br>(28,6%) | 10<br>(91%) | 7 5<br>(8%)  | 11<br>(68,7%) | 14<br>(82,4%) | 53<br>(69,8%) |

**Table S2.** Mean decrease in hemoglobin level after surgery in patients who underwent primary vulvar cancer surgery in 2006-2011. ns = not significant

|                                                      | hemivulvectomy<br>(n=32)                     | vulvectomy (n=12)                                | <i>p</i>  |
|------------------------------------------------------|----------------------------------------------|--------------------------------------------------|-----------|
| drop in hemoglobin<br>levels postoperative<br>(g/dL) | 1,4±0,8 (+SLNB)<br>1,7±1,4(+lymphadenectomy) | 1,7±1,2 (+SLNB)<br>1,7±1,2<br>(+lymphadenectomy) | <i>ns</i> |

**Table S3.** Number of histologically determined lymph nodes removed during SNB and lymphonodectomy.

|                               | Average number of lymph nodes<br>removed ± SD |
|-------------------------------|-----------------------------------------------|
| SLNB - right side             | 1,96±1,62                                     |
| SLNB - left side              | 2,37±1,58                                     |
| right<br>lymphadenectomy      | 6,34±2,92                                     |
| left lymphadenectomy          | 6,79±3,12                                     |
| unilateral<br>lymphadenectomy | 8,13±5,89                                     |
